# Supplementary material for: Synthesis of ZnO/Au and ZnO/Ag nanoparticles and their photocatalytic application using UV and visible light
Source: Royal Society of Chemistry journal article supplement (doi:10.1039/c4ra03158j), 2014-01-01
Supplement: c4ra03158j1.pdf [file c4ra03158j1.pdf]

**Supporting Information**

**Synthesis of ZnO/Au and ZnO/Ag Nanoparticles and Their Photocatalytic Application  
Using UV and Visible Light**

Pragati Fageria, Subhashis Gangopadhyay<sup>§</sup>, and Surojit Pande<sup>\*</sup>

*Department of Chemistry, Birla Institute of Technology and Science, Pilani, Rajasthan, 333031, India.*

*E-mail: [spande@pilani.bits-pilani.ac.in](mailto:spande@pilani.bits-pilani.ac.in)*

*[surojitpande@gmail.com](mailto:surojitpande@gmail.com)*

*Tel.: +91-1596 515709. Fax: +91-1596 244183*

*<sup>§</sup>Department of Physics, Birla Institute of Technology and Science, Pilani, Rajasthan, 333031, India.*

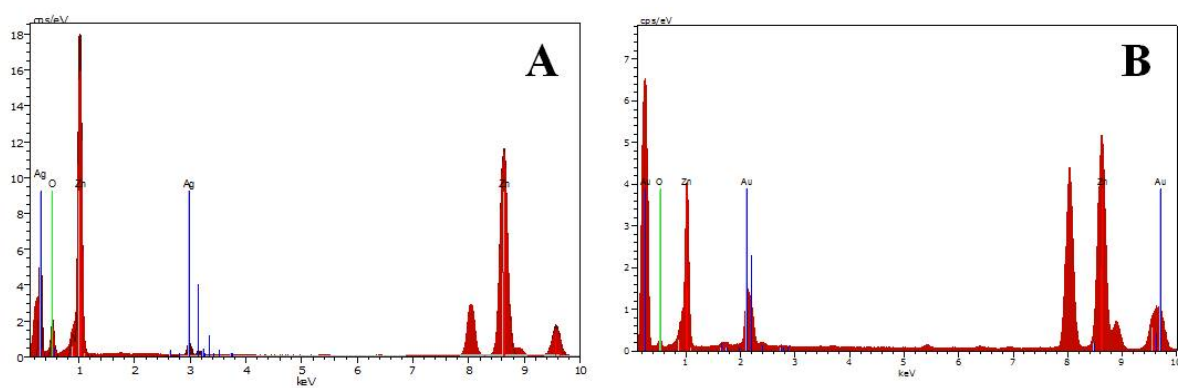

**Figure S1.** EDS Spectrum of ZnO/Au (a) and ZnO/Ag nanoparticles (b)

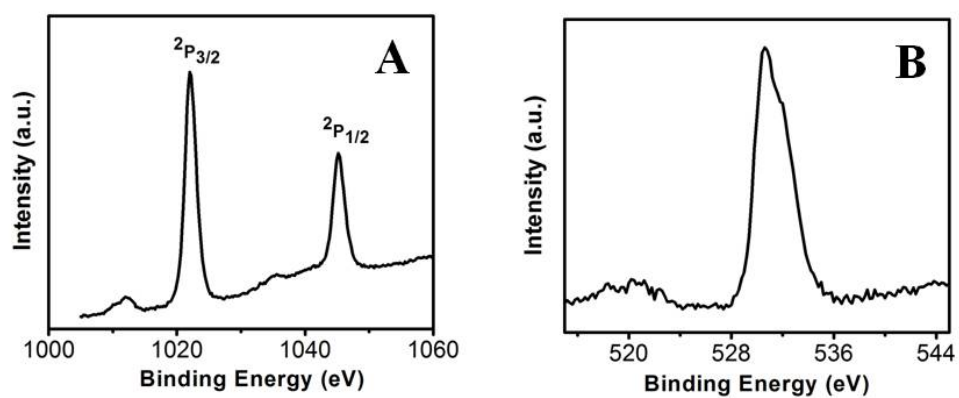

**Figure S2.** (a) High-resolution X-ray Photoelectron spectrum of Zn and (b) High-resolution X-ray Photoelectron spectrum of O

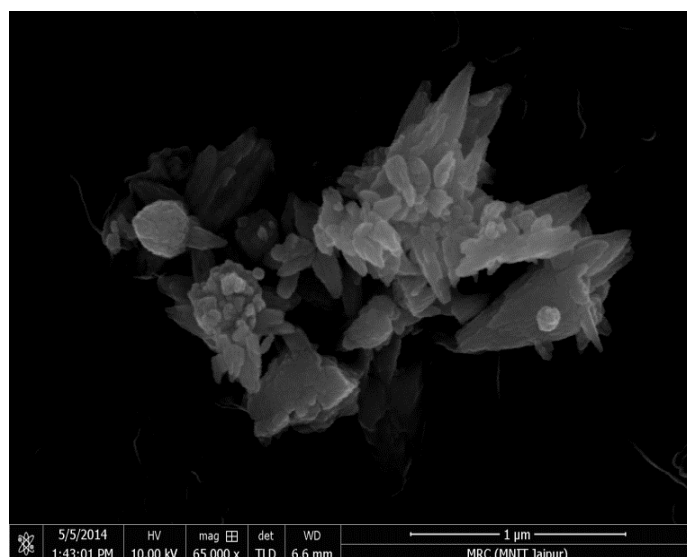

**Figure S3.** FESEM image of ZnO nanoparticles synthesized without CTAB, agglomerated particles of ZnO

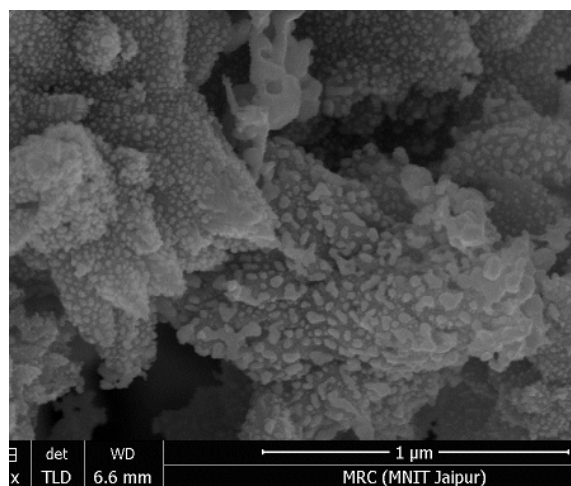

**Figure S4.** FESEM image of ZnO/Au using Sodium borohydride (non-uniform deposition of Au nanoparticles)

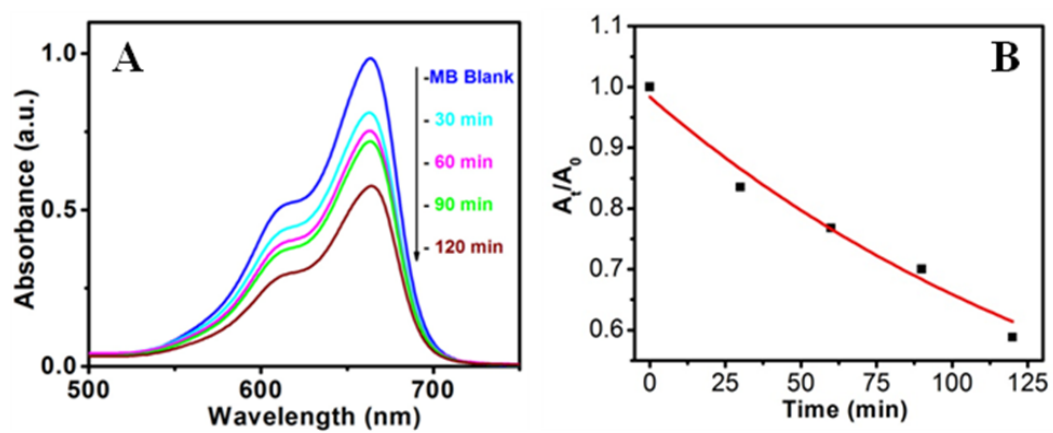

**Figure S5.** (a) Degradation of MB dye in presence of ZnO/Ag nanoparticles under visible light and (b)  $A_t/A_0$  vs. time (min) plot

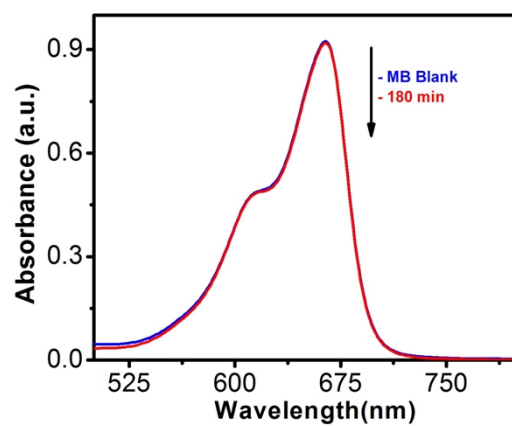

**Figure S6.** Degradation of MB dye in presence of ZnO, ZnO/Au, and ZnO/Ag nanoparticles under dark condition

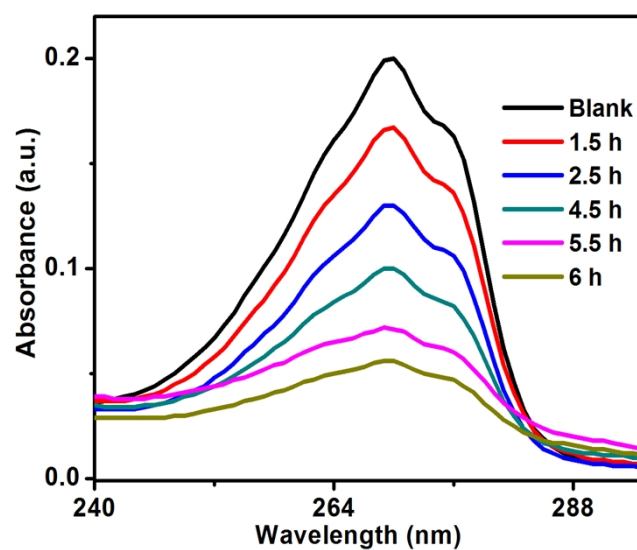

**Figure S7** Decomposition of phenol using ZnO/Ag under irradiation with visible light



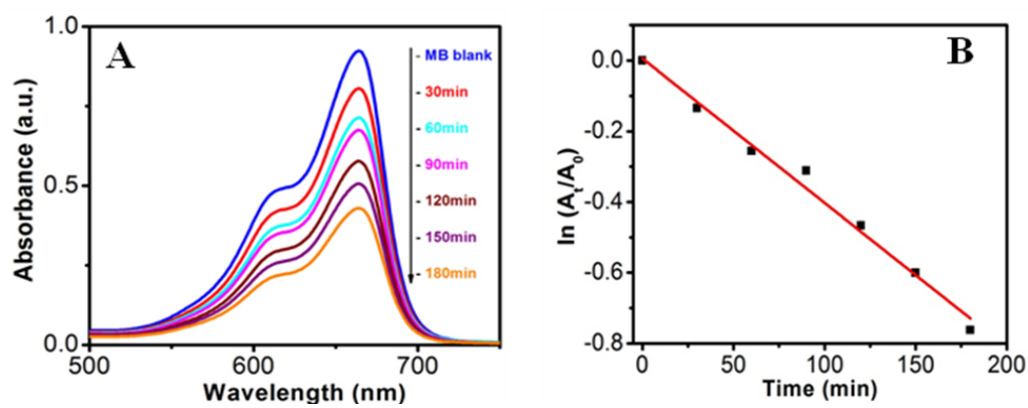

**Figure S8.** (a) Degradation of MB dye in presence of ZnO nanoparticles under UV light and (b)  $\ln A_t/A_0$  vs. time (min) plot

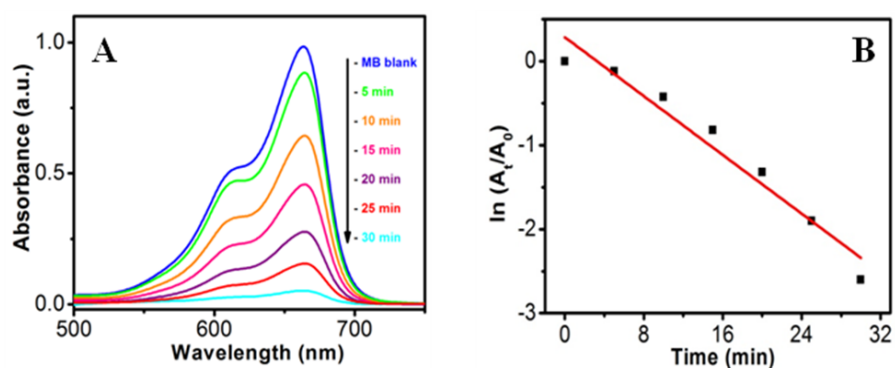

**Figure S9.** (a) Degradation of MB dye in presence of ZnO/Au nanoparticles under UV light and (b)  $\ln A_t/A_0$  vs. time (min) plot

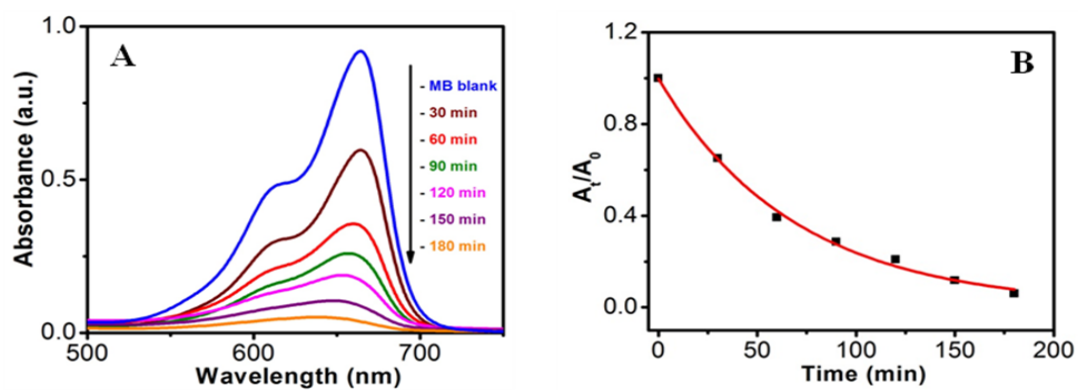

**Figure S10.** (a) Degradation of MB dye in presence of ZnO/Ag nanoparticles under UV light and (b)  $A_t/A_0$  vs. time (min) plot

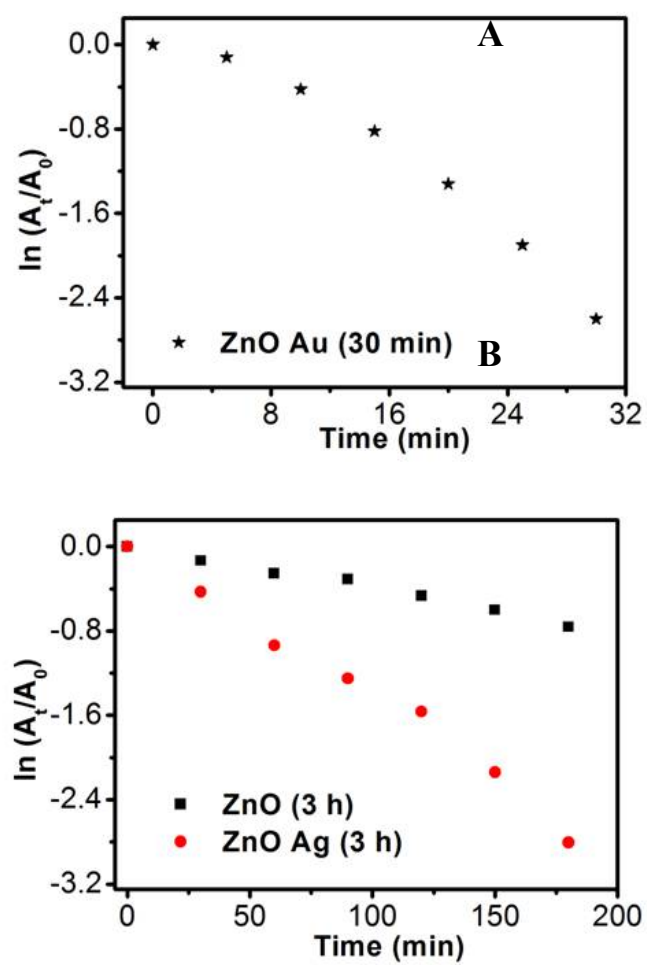

**Figure S11.** Comparative study using ZnO/Au (a), ZnO, and ZnO/Ag (b)

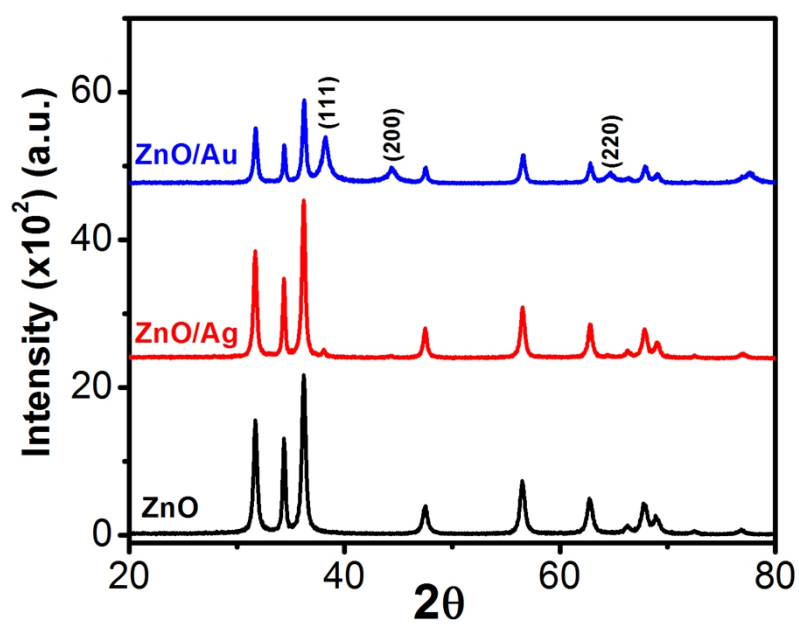

**Figure S12.** Powder X-ray diffraction (PXRD) patterns of ZnO, ZnO/Au, and ZnO/Ag nanoparticles after reusability of catalyst.

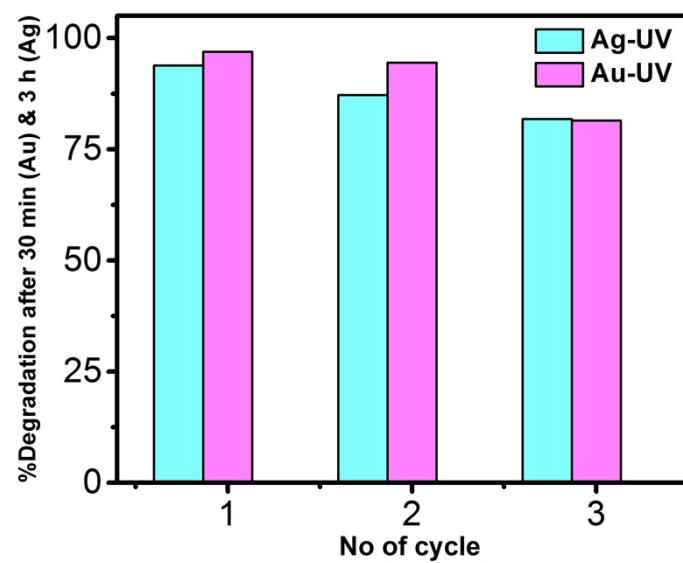

**Figure S13.** Reusability test with ZnO/Au and ZnO/Ag nanoparticles using UV light
